# Supplementary material
Source: Springer Nature journal article supplement (https://www.springermedizin.de/resource/supplementary/12872_2014_741_MOESM10_ESM.pdf/9430780)

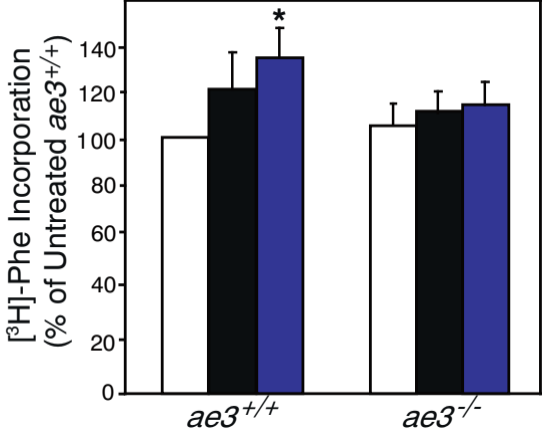

Supplement: MOESM10 [file 9430780]
